# Supplementary material for: Trends in bidi and cigarette smoking in India from 1998 to 2015, by age, gender and education
Source: PubMed Central journal article supplement (PMC5321300; doi:10.1136/bmjgh-2015-000005), 2016-04-06

**Web Figure 1:** Age standardized smoking rates among men by age group, product and number of smokers (in millions) in rural India: 1998-2010.

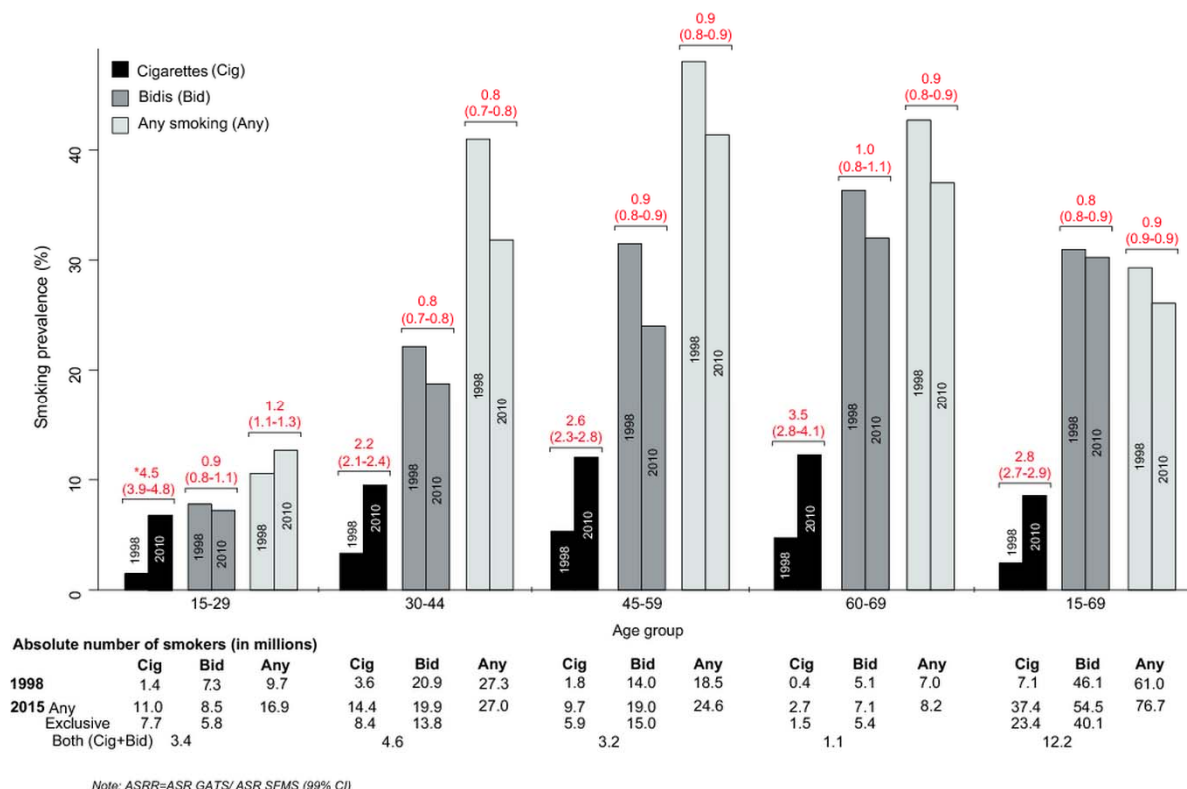

**Web Figure 2:** Age standardized smoking rates among men by age group, product and number of smokers (in millions) in urban India: 1998-2010

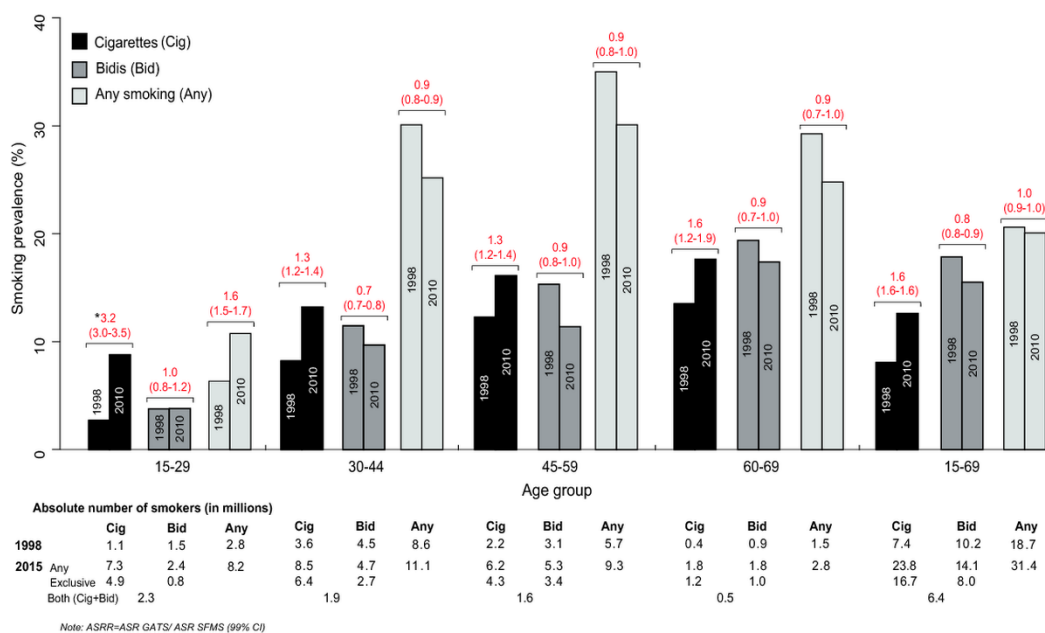

Supplement: bmjgh-2015-000005supp_figures.pdf [file bmjgh-2015-000005supp_figures.pdf]
