# Supplementary material for: Trends in bidi and cigarette smoking in India from 1998 to 2015, by age, gender and education
Source: PubMed Central journal article supplement (PMC5321300; doi:10.1136/bmjgh-2015-000005), 2016-04-06
Supplement: bmjgh-2015-000005supp_tables.pdf [file bmjgh-2015-000005supp_tables.pdf]

# Supplementary Appendix

**Web Table 1: Number of smokers in India (sample and population): 1998 and 2010.**

| State and Region               | Number of smokers studied | Number of smokers (000) |               | Absolute change per decade(%) |
|--------------------------------|---------------------------|-------------------------|---------------|-------------------------------|
|                                | 1998/2010                 | 1998                    | 2015          |                               |
| <b>Men 15-69 Years</b>         |                           |                         |               |                               |
| Himachal Pradesh               | 10,998/360                | 674                     | 839           | 14                            |
| Punjab                         | 4095/160                  | 560                     | 1700          | 120                           |
| Chandigarh                     | 2175/204                  | 64                      | 84            | 19                            |
| Haryana                        | 24,254/364                | 2291                    | 3231          | 24                            |
| Delhi                          | 4815/328                  | 612                     | 2851          | 215                           |
| Rajasthan                      | 34,952/370                | 5286                    | 8035          | 31                            |
| Uttar Pradesh & Uttaranchal    | 54,445/821                | 14,523                  | 18,014        | 14                            |
| Bihar & Jharkhand              | 38,646/381                | 7413                    | 7855          | 4                             |
| Assam                          | 28,840/713                | 3044                    | 2340          | -14                           |
| West Bengal                    | 67,614/652                | 11,058                  | 13,582        | 13                            |
| Odisha                         | 15,667/230                | 1878                    | 3488          | 50                            |
| Madhya Pradesh & Chhattisgarh  | 31,865/479                | 6168                    | 9165          | 29                            |
| Gujarat                        | 20,659/258                | 3443                    | 4242          | 14                            |
| Maharashtra                    | 12,906/326                | 3441                    | 5707          | 39                            |
| Andhra Pradesh                 | 30,599/416                | 7323                    | 9605          | 18                            |
| Karnataka                      | 27,452/217                | 3863                    | 5333          | 22                            |
| Goa                            | 3924/84                   | 76                      | 33            | -33                           |
| Kerala                         | 21,462/230                | 2270                    | 3534          | 33                            |
| Tamil Nadu                     | 20,636/268                | 3575                    | 5315          | 29                            |
| Northeast                      | 44,693/2379               | 1386                    | 2796          | 60                            |
| Rural Men                      | 41,2042/6449              | 60,957                  | 76,718        | 15                            |
| Urban Men                      | 96,965/3321               | 18,746                  | 31407         | 40                            |
| INDIA TOTAL                    | <b>509,007/9770</b>       | 79,428                  | 108,125       | 21                            |
| <b>Total 70+</b>               | 21,864/478                | 4128                    | 5896          | 25                            |
| <b>Total 15+</b>               | 530,871/10248             | 83,437                  | 114,021       | 22                            |
| <b>Women 15-69 Years INDIA</b> | <b>31,949/1214</b>        |                         | <b>11,183</b> | <b>-*</b>                     |

Note: \* Reliable estimates for annual absolute change (%) for women could not be estimated since we believe that smoking among women has been declining based on our estimation by birth cohorts.

**Web Table 2a: The 1998 and 2010 age standardized smoking prevalence for ages 15-69 years and 15-29 years, by state and location of residence and the 2004 non-standardized rates of smoking for 15-29 years\* .**

| States/ Regions              | 15-69 years |      |       |      |       |      | 15-29 years |      |      |       |      |      |       |      |      |
|------------------------------|-------------|------|-------|------|-------|------|-------------|------|------|-------|------|------|-------|------|------|
|                              | Total       |      | Rural |      | Urban |      | Total       |      |      | Rural |      |      | Urban |      |      |
|                              | 1998        | 2010 | 1998  | 2010 | 1998  | 2010 | 1998        | 2004 | 2010 | 1998  | 2004 | 2010 | 1998  | 2004 | 2010 |
| <b>Men</b>                   |             |      |       |      |       |      |             |      |      |       |      |      |       |      |      |
| Himachal Pradesh             | 38.2        | 33.1 | 38.2  | 33.1 | 38    | 33.1 | 12.1        | 8.0  | 13.7 | 12.2  | 7.8  | 12.7 | 11.0  | 8.6  | 19.6 |
| Punjab                       | 7.5         | 12.7 | 7.5   | 12.8 | 7.5   | 12.7 | 3.0         | 5.4  | 8.3  | 2.6   | 4.8  | 5.4  | 3.7   | 7.0  | 12.6 |
| Chandigarh                   | 19.4        | 18.0 | 18.9  | 16.5 | 19.4  | 18.1 | 11.4        | 11.2 | 9.6  | 21.9  | 17.8 | 19.3 | 9.9   | 7.5  | 8.3  |
| Haryana                      | 38.2        | 32.3 | 37.9  | 32.0 | 38.8  | 32.9 | 16.0        | 17.2 | 12.7 | 19.2  | 20.6 | 14.3 | 7.4   | 10.8 | 9.3  |
| Delhi                        | 13.9        | 31.4 | 13.5  | 31.0 | 13.9  | 31.4 | 4.8         | 10.3 | 20.8 | 6.5   | 10.5 | 9.8  | 4.7   | 10.3 | 21.1 |
| Rajasthan                    | 34.7        | 31.9 | 34.6  | 31.7 | 35.1  | 32.4 | 14.3        | 21.4 | 12.8 | 16.0  | 24.7 | 13.2 | 9.0   | 5.8  | 11.5 |
| Uttar Pradesh/ Uttaranchal   | 30.8        | 25.1 | 30.8  | 25.1 | 30.6  | 24.9 | 10.0        | 13.8 | 9.9  | 10.6  | 15.2 | 11.0 | 7.9   | 8.3  | 6.0  |
| Bihar/ Jharkhand             | 25.8        | 19.6 | 25.8  | 19.6 | 25.6  | 19.5 | 7.9         | 12.0 | 16.0 | 8.3   | 14.1 | 16.8 | 5.7   | 6.8  | 11.2 |
| Assam                        | 39.8        | 25.7 | 39.4  | 25.5 | 42.0  | 26.6 | 15.0        | 18.9 | 15.4 | 15.7  | 23.0 | 14.2 | 10.7  | 16.0 | 21.1 |
| West Bengal                  | 44.7        | 39.2 | 44.0  | 38.8 | 46.2  | 40.1 | 20.7        | 19.8 | 23.9 | 21.7  | 21.5 | 23.8 | 18.0  | 15.3 | 24.1 |
| Odisha                       | 17.5        | 20.4 | 17.5  | 20.3 | 17.4  | 20.6 | 6.0         | 11.7 | 10.1 | 6.5   | 12.7 | 10.1 | 3.8   | 8.2  | 11.0 |
| Madhya Pradesh/ Chhattisgarh | 27.4        | 25.7 | 27.3  | 25.7 | 27.5  | 25.8 | 8.8         | 12.8 | 16.2 | 10.2  | 16.7 | 15.4 | 5.1   | 5.3  | 19.6 |
| Gujarat                      | 22.8        | 18.8 | 22.9  | 19.0 | 22.6  | 18.7 | 7.5         | 9.5  | 3.7  | 6.9   | 10.9 | 3.5  | 8.3   | 5.4  | 4.0  |
| Maharashtra                  | 11.6        | 12.2 | 11.6  | 12.2 | 11.6  | 12.1 | 2.6         | 2.8  | 4.8  | 2.7   | 2.0  | 3.5  | 2.5   | 4.2  | 6.1  |
| Andhra Pradesh               | 31.8        | 29.7 | 31.8  | 29.8 | 31.7  | 29.3 | 11.0        | 8.4  | 12.0 | 12.3  | 8.8  | 11.6 | 7.7   | 7.0  | 12.9 |
| Karnataka                    | 24.4        | 22.3 | 24.4  | 22.3 | 24.3  | 22.3 | 6.8         | 7.1  | 9.6  | 6.7   | 6.9  | 8.7  | 6.8   | 7.9  | 10.8 |
| Goa                          | 17.8        | 9.0  | 18.1  | 9.0  | 17.7  | 8.9  | 2.3         | 2.3  | 4.0  | 2.3   | 2.4  | 4.4  | 2.2   | 2.2  | 3.7  |
| Kerala                       | 24.6        | 27.8 | 24.5  | 27.8 | 24.7  | 27.9 | 6.9         | 9.0  | 16.6 | 7.7   | 9.7  | 14.6 | 4.7   | 5.8  | 22.6 |
| Tamil Nadu                   | 18.0        | 18.6 | 17.7  | 18.3 | 18.4  | 18.8 | 5.2         | 5.3  | 7.2  | 4.7   | 5.2  | 6.0  | 5.9   | 5.5  | 8.4  |
| North East                   | 39.4        | 48.6 | 39.0  | 48.4 | 40.2  | 49.1 | 17.6        | 21.7 | 34.9 | 18.2  | 22.0 | 34.5 | 16.0  | 20.3 | 35.9 |
| INDIA TOTAL                  | 26.7        | 24.3 | 29.3  | 26.0 | 21.0  | 20.4 | 9.4         | 11.8 | 12.3 | 10.4  | 13.0 | 12.8 | 7.0   | 8.8  | 11.1 |
| <b>Women</b>                 |             |      |       |      |       |      |             |      |      |       |      |      |       |      |      |
| INDIA TOTAL                  | 1.4         | 2.7  | 1.6   | 3.3  | 0.9   | 0.4  | 0.6         | 1.3  | 0.5  | 0.7   | 1.5  | 0.7  | 0.5   | 0.8  | 0.2  |

*Note: The 2004 estimates are age-specific prevalence estimates from SRSBL. SRSBL provided appropriate age specific patterns that are close to 2011 census population which is used as the standard population for age standardized rates using SFMS and GATS.*

**Web Table 2b: The 1998 and 2010 age standardized smoking prevalence for ages 30-44 years and 45-59 years, by state and location of residence and the 2004 non-standardized rates of smoking at these ages\* .**

| States/ Regions              | 30-44 years |      |      |       |      |      |       |      |      | 45-59 years |      |      |       |      |      |       |      |      |
|------------------------------|-------------|------|------|-------|------|------|-------|------|------|-------------|------|------|-------|------|------|-------|------|------|
|                              | Total       |      |      | Rural |      |      | Urban |      |      | Total       |      |      | Rural |      |      | Urban |      |      |
|                              | 1998        | 2004 | 2010 | 1998  | 2004 | 2010 | 1998  | 2004 | 2010 | 1998        | 2004 | 2010 | 1998  | 2004 | 2010 | 1998  | 2004 | 2010 |
| <b>Men</b>                   |             |      |      |       |      |      |       |      |      |             |      |      |       |      |      |       |      |      |
| Himachal Pradesh             | 51.1        | 38.1 | 40.2 | 52.0  | 41.9 | 40.9 | 45.5  | 30.9 | 34.6 | 62.6        | 47.7 | 57.3 | 64.6  | 54.9 | 60.2 | 49.4  | 34.3 | 37.5 |
| Punjab                       | 10.5        | 15.1 | 17.0 | 9.7   | 13.3 | 16.9 | 11.7  | 19.0 | 17.3 | 11.6        | 15.7 | 12.3 | 11.3  | 13.7 | 11.6 | 12.1  | 20.5 | 12.7 |
| Chandigarh                   | 28.6        | 28.0 | 20.5 | 45.6  | 31.0 | 27.1 | 26.5  | 26.8 | 19.6 | 23.5        | 26.0 | 28.2 | 35.0  | 28.0 | 47.2 | 22.7  | 25.5 | 26.4 |
| Haryana                      | 53.7        | 47.5 | 42.2 | 62.9  | 56.9 | 44.2 | 35.1  | 32.3 | 38.7 | 60.0        | 51.4 | 55.5 | 70.7  | 63.0 | 58.3 | 40.6  | 34.1 | 49.4 |
| Delhi                        | 20.3        | 29.6 | 35.4 | 26.6  | 33.6 | 63.1 | 20.0  | 29.1 | 34.7 | 23.0        | 34.5 | 37.9 | 31.4  | 46.4 | 71.6 | 22.6  | 33.0 | 36.8 |
| Rajasthan                    | 48.6        | 47.7 | 46.1 | 54.5  | 53.2 | 51.7 | 31.9  | 23.0 | 30.5 | 56.3        | 53.6 | 54.3 | 62.1  | 59.0 | 61.5 | 40.7  | 29.2 | 35.7 |
| Uttar Pradesh/ Uttaranchal   | 44.2        | 40.2 | 33.7 | 46.7  | 43.5 | 36.8 | 36.5  | 27.4 | 24.1 | 54.3        | 45.1 | 42.9 | 57.4  | 48.6 | 45.3 | 44.8  | 32.2 | 36.6 |
| Bihar/ Jharkhand             | 36.0        | 29.9 | 21.5 | 36.3  | 32.4 | 21.8 | 34.0  | 23.6 | 20.1 | 44.2        | 33.1 | 23.8 | 44.7  | 35.6 | 25.5 | 42.4  | 27.2 | 14.8 |
| Assam                        | 53.9        | 44.5 | 29.7 | 55.4  | 48.7 | 28.3 | 46.3  | 42.0 | 36.5 | 66.1        | 48.9 | 38.2 | 67.7  | 54.3 | 40.6 | 58.0  | 45.8 | 28.8 |
| West Bengal                  | 61.3        | 52.1 | 48.8 | 64.7  | 54.7 | 49.1 | 53.8  | 46.3 | 47.1 | 63.8        | 57.1 | 52.6 | 68.3  | 61.3 | 54.6 | 56.5  | 49.6 | 48.3 |
| Odisha                       | 24.3        | 31.3 | 29.5 | 25.2  | 32.5 | 31.8 | 19.9  | 26.9 | 22.3 | 27.5        | 57.5 | 26.5 | 27.6  | 38.3 | 27.5 | 26.9  | 32.2 | 24.3 |
| Madhya Pradesh/ Chhattisgarh | 38.7        | 33.4 | 28.5 | 42.7  | 39.3 | 29.7 | 28.3  | 22.4 | 23.4 | 46.6        | 39.2 | 39.1 | 50.3  | 44.6 | 43.4 | 37.7  | 29.4 | 21.4 |
| Gujarat                      | 29.1        | 31.2 | 23.0 | 32.0  | 35.5 | 27.9 | 24.8  | 18.3 | 16.6 | 40.0        | 42.0 | 40.5 | 44.7  | 47.4 | 47.5 | 32.5  | 23.3 | 29.2 |
| Maharashtra                  | 16.2        | 12.4 | 13.8 | 19.2  | 11.7 | 11.1 | 13.0  | 13.6 | 16.6 | 21.1        | 45.1 | 22.3 | 24.9  | 18.7 | 21.5 | 16.6  | 16.7 | 23.1 |
| Andhra Pradesh               | 43.5        | 33.4 | 34.3 | 47.0  | 35.1 | 35.0 | 35.0  | 27.1 | 32.3 | 51.6        | 41.8 | 48.5 | 55.0  | 44.3 | 51.0 | 41.9  | 32.0 | 41.3 |
| Karnataka                    | 34.0        | 28.8 | 28.6 | 35.8  | 29.7 | 32.6 | 30.9  | 25.1 | 22.4 | 42.7        | 37.7 | 39.0 | 45.3  | 39.7 | 46.2 | 38.3  | 27.9 | 26.4 |
| Goa                          | 20.3        | 12.0 | 9.2  | 23.7  | 11.4 | 9.0  | 17.5  | 13.4 | 9.2  | 34.3        | 21.1 | 15.8 | 43.4  | 21.8 | 17.9 | 27.0  | 19.6 | 15.5 |
| Kerala                       | 32.0        | 39.5 | 32.4 | 33.8  | 42.4 | 35.0 | 27.2  | 27.3 | 25.4 | 38.2        | 47.9 | 37.1 | 41.0  | 51.1 | 38.9 | 31.0  | 34.6 | 34.2 |
| Tamil Nadu                   | 25.8        | 21.9 | 22.1 | 25.2  | 22.5 | 22.3 | 26.4  | 20.9 | 22.0 | 28.3        | 26.4 | 30.0 | 28.6  | 27.7 | 29.3 | 28.0  | 23.4 | 29.1 |
| North East                   | 54.1        | 52.7 | 57.2 | 55.7  | 53.3 | 60.7 | 49.2  | 50.3 | 47.2 | 63.6        | 57.5 | 62.2 | 65.8  | 58.1 | 67.0 | 57.6  | 55.3 | 48.6 |
| INDIA TOTAL                  | 37.3        | 34.6 | 29.8 | 41.1  | 37.2 | 32.1 | 29.2  | 28.3 | 24.9 | 43.7        | 40.5 | 38.2 | 47.9  | 43.8 | 41.6 | 35.1  | 32.5 | 30.8 |
| <b>Women</b>                 |             |      |      |       |      |      |       |      |      |             |      |      |       |      |      |       |      |      |
| INDIA TOTAL                  | 1.4         | 2.2  | 2.7  | 1.7   | 1.6  | 3.4  | 0.9   | 0.9  | 0.3  | 2.4         | 3.7  | 5.0  | 2.8   | 2.8  | 6.2  | 1.4   | 1.4  | 0.8  |

*Note: The 2004 estimates are age-specific prevalence estimates from SRSBL. SRSBL provided appropriate age specific patterns that are close to 2011 census population which is used as the standard population for age standardized rates using SFMS and GATS.*

**Web Table 2c: The 1998 and 2010 age standardized smoking prevalence for ages 60-69 years and 70+ years, by state and location of residence.**

| States/ Regions              | 60-69 years |      |       |      |       |      | 70+ years |      |       |      |       |      |
|------------------------------|-------------|------|-------|------|-------|------|-----------|------|-------|------|-------|------|
|                              | Total       |      | Rural |      | Urban |      | Total     |      | Rural |      | Urban |      |
|                              | 1998        | 2010 | 1998  | 2010 | 1998  | 2010 | 1998      | 2010 | 1998  | 2010 | 1998  | 2010 |
| <b>Men</b>                   |             |      |       |      |       |      |           |      |       |      |       |      |
| Himachal Pradesh             | 60.5        | 41.6 | 62.4  | 47.4 | 39.3  | 8.6  | 54.7      | 47.2 | 56.5  | 49.4 | 30.3  | 0.0  |
| Punjab                       | 10.3        | 21.6 | 10.6  | 25.6 | 9.6   | 13.6 | 8.6       | 12.2 | 9.3   | 16.5 | 6.6   | 7.1  |
| Chandigarh                   | 18.6        | 29.4 | 24.2  | 66.7 | 18.1  | 26.9 | 14.6      | 28.4 | 26.6  | 100  | 13.6  | 3.9  |
| Haryana                      | 62.6        | 52.2 | 72.7  | 60.6 | 34.3  | 46.0 | 54.8      | 56.1 | 64.5  | 66.8 | 27.7  | 16.9 |
| Delhi                        | 17.5        | 57.8 | 35.2  | 35.4 | 16.7  | 57.4 | 11.8      | 0.0  | 32.1  | 0.0  | 10.9  | 0.0  |
| Rajasthan                    | 55.0        | 30.2 | 59.3  | 35.8 | 40.9  | 18.8 | 44.6      | 30.2 | 50.2  | 33.3 | 30.0  | 42.4 |
| Uttar Pradesh/ Uttaranchal   | 50.5        | 45.7 | 52.9  | 49.7 | 40.6  | 30.3 | 40.6      | 32.2 | 43.1  | 30.0 | 31.3  | 45.1 |
| Bihar/ Jharkhand             | 42.1        | 24.4 | 42.4  | 25.5 | 40.6  | 17.5 | 33.3      | 24.8 | 33.9  | 24.8 | 29.2  | 25.6 |
| Assam                        | 62.9        | 33.8 | 65.9  | 34.9 | 46.5  | 35.7 | 55.3      | 33.3 | 58.0  | 36.4 | 41.5  | 0.0  |
| West Bengal                  | 53.2        | 42.8 | 59.5  | 38.7 | 41.9  | 48.9 | 33.4      | 28.0 | 39.7  | 35.3 | 24.8  | 16.9 |
| Odisha                       | 23.0        | 14.7 | 23.1  | 14.4 | 22.1  | 21.3 | 17.8      | 15.6 | 18.6  | 20.4 | 13.1  | 0.0  |
| Madhya Pradesh/ Chhattisgarh | 42.9        | 37.0 | 45.3  | 34.7 | 34.4  | 49.4 | 31.2      | 31.9 | 35.4  | 36.3 | 19.3  | 7.4  |
| Gujarat                      | 40.5        | 35.4 | 44.2  | 46.3 | 32.5  | 22.5 | 33.1      | 47.1 | 37.6  | 58.4 | 23.8  | 30.1 |
| Maharashtra                  | 19.0        | 20.2 | 23.2  | 24.5 | 12.7  | 15.3 | 13.3      | 16.9 | 17.0  | 21.1 | 8.4   | 7.9  |
| Andhra Pradesh               | 44.8        | 51.8 | 48.2  | 57.7 | 32.2  | 36.0 | 34.3      | 39.8 | 37.5  | 40.7 | 22.5  | 37.4 |
| Karnataka                    | 36.0        | 26.0 | 38.5  | 31.1 | 31.6  | 18.4 | 27.0      | 45.6 | 30.1  | 56.6 | 22.0  | 16.5 |
| Goa                          | 34.5        | 10.9 | 41.5  | 14.7 | 27.9  | 5.0  | 26.5      | 3.6  | 29.8  | 5.3  | 23.2  | 0.0  |
| Kerala                       | 29.5        | 31.2 | 31.2  | 37.8 | 24.8  | 12.2 | 18.4      | 29.3 | 19.0  | 31.2 | 16.4  | 22.6 |
| Tamil Nadu                   | 19.9        | 24.5 | 20.9  | 30.5 | 18.4  | 19.0 | 11.4      | 29.2 | 12.1  | 41.6 | 10.5  | 16.2 |
| North East                   | 60.2        | 56.8 | 62.3  | 61.3 | 53.1  | 41.1 | 52.7      | 55.0 | 54.6  | 60.9 | 46.7  | 17.7 |
| INDIA TOTAL                  | 39.1        | 33.4 | 43.0  | 36.8 | 28.7  | 24.8 | 30.0      | 30.0 | 34.1  | 33.8 | 19.9  | 18.7 |
| <b>Women</b>                 |             |      |       |      |       |      |           |      |       |      |       |      |
| INDIA TOTAL                  | 3.0         | 8.7  | 3.5   | 10.8 | 1.8   | 1.1  | 2.8       | 10.6 | 3.3   | 12.8 | 1.6   | 1.5  |

**Web Table 3: The 1998 and 2010 age standardized rates and age standardized rates ratios of smoking among men aged 15-69 years, by education level and type of product.**

| Smoke Type         | Illiterate or no formal education |               | Less than 10 <sup>th</sup> grade |               | 10 <sup>th</sup> grade and above |               |
|--------------------|-----------------------------------|---------------|----------------------------------|---------------|----------------------------------|---------------|
|                    | 1998/2010                         | ASRR          | 1998/2010                        | ASRR          | 1998/2010                        | ASRR          |
| <b>Any Smoking</b> |                                   |               |                                  |               |                                  |               |
| 15-29 years        | 13.9/22.1                         | 1.6 (1.1-2.0) | 9.4/14.5                         | 1.5 (1.4-1.7) | 4.9/7.5                          | 1.5 (1.3-1.7) |
| 30-44years         | 46.5/39.9                         | 0.9 (0.8-0.9) | 36.0/32.2                        | 0.9 (0.8-1.0) | 25.5/20.1                        | 0.8 (0.7-0.9) |
| 45-59years         | 51.4/47.9                         | 0.9 (0.9-1.0) | 41.7/41.2                        | 1.0 (0.9-1.1) | 30.1/23.1                        | 0.8 (0.7-0.9) |
| 60-69years         | 45.1/40.9                         | 0.9 (0.8-1.0) | 34.6/32.1                        | 0.9 (0.8-1.1) | 22.9/20.2                        | 0.9 (0.6-1.1) |
| 15-69years         | 33.9/35.4                         | 1.0 (1.0-1.1) | 25.1/26.1                        | 1.0 (1.0-1.1) | 17.8/15.2                        | 0.9 (0.8-0.9) |
| 70+years           | 35.2/35.5                         | 1.0 (0.9-1.2) | 24.2/28.9                        | 1.2 (1.0-1.4) | 15.5/11.2                        | 0.7 (0.3-1.0) |
| <b>Cigarettes</b>  |                                   |               |                                  |               |                                  |               |
| 15-29 years        | 1.6/10.8                          | 6.8 (2.9-9.8) | 2.0/8.1                          | 4.1 (3.6-4.5) | 2.0/6.2                          | 3.1 (2.6-3.4) |
| 30-44years         | 4.3/10.7                          | 2.5 (2.1-2.8) | 7.8/14.1                         | 1.8 (1.6-2.0) | 12.5/14                          | 1.1 (1.0-1.2) |
| 45-59years         | 3.7/11.8                          | 3.2 (2.4-3.8) | 8.2/15.0                         | 1.8 (1.6-2.0) | 15.3/14.7                        | 1.0 (0.8-1.1) |
| 60-69years         | 2.2/9.3                           | 4.2 (3.0-5.1) | 5.3/9.3                          | 1.8 (1.2-2.2) | 9.2/11.8                         | 1.3 (0.9-1.6) |
| 15-69years         | 2.9/10.4                          | 3.6 (3.0-4.0) | 5.1/11.2                         | 2.2 (2.1-2.3) | 8.5/10.6                         | 1.3 (1.2-1.3) |
| 70+years           | 1.6/6.8                           | 4.4 (2.7-5.6) | 3.2/8.4                          | 2.7 (1.6-3.5) | 5.9/3.8                          | 0.6 (0.1-1.0) |
| <b>Bidis</b>       |                                   |               |                                  |               |                                  |               |
| 15-29 years        | 10.9/14                           | 1.3 (0.9-1.6) | 6.6/8.1                          | 1.2 (1.0-1.5) | 2.4/1.9                          | 0.8 (0.5-1.0) |
| 30-44years         | 37.2/33.1                         | 0.9 (0.8-1.0) | 25.4/22.7                        | 0.9 (0.8-1.0) | 11.0/7.8                         | 0.7 (0.6-0.8) |
| 45-59years         | 40.2/38.7                         | 1.0 (0.9-1.1) | 29.4/30.2                        | 1.0 (0.9-1.1) | 12.2/11.1                        | 0.9 (0.7-1.1) |
| 60-69years         | 32.9/33.4                         | 1.0 (0.8-1.2) | 24.4/25.8                        | 1.1 (0.9-1.2) | 10.4/11                          | 1.0 (0.5-1.5) |
| 15-69years         | 26.6/27.9                         | 1.0 (1.0-1.1) | 17.7/18.0                        | 1.0 (1.0-1.1) | 7.8/6.1                          | 0.8 (0.7-0.9) |
| 70+years           | 22.4/26.8                         | 1.2 (1.0-1.4) | 15.9/21.1                        | 1.3 (1.0-1.6) | 6.9/7.4                          | 1.1(0.2-1.6)  |
